# Supplementary material
Source: MDPI journal article supplement (https://www.mdpi.com/2073-4441/12/11/3250)
Supplement: s1 [file s1]

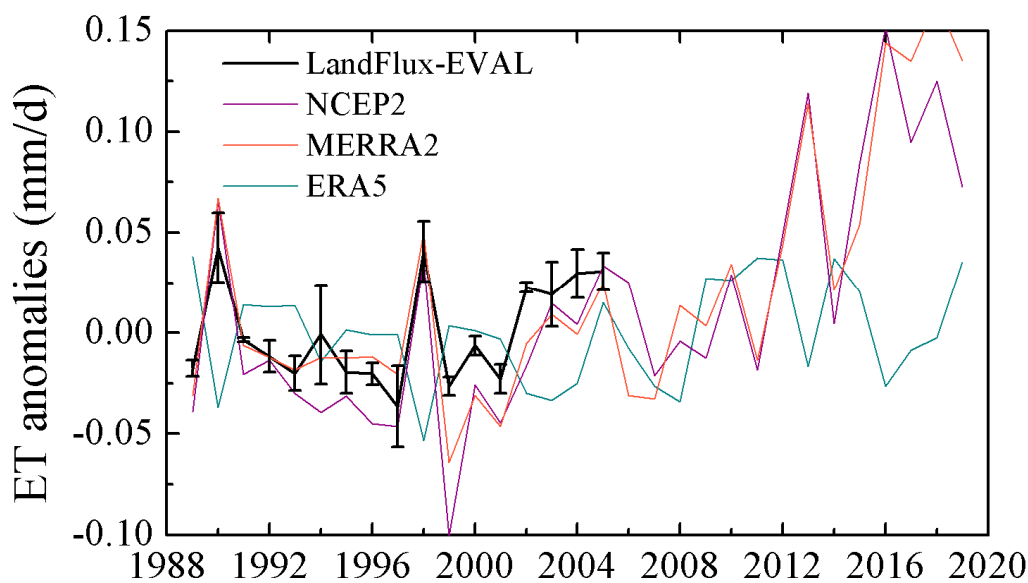

**Figure S1.** Evolution of national mean ET anomalies from 1989 to 2019 in China for LandFlux-EVAL, NCEP2, MERRA2 and ERA5. The black line with an error bar represents the annual ET anomalies.

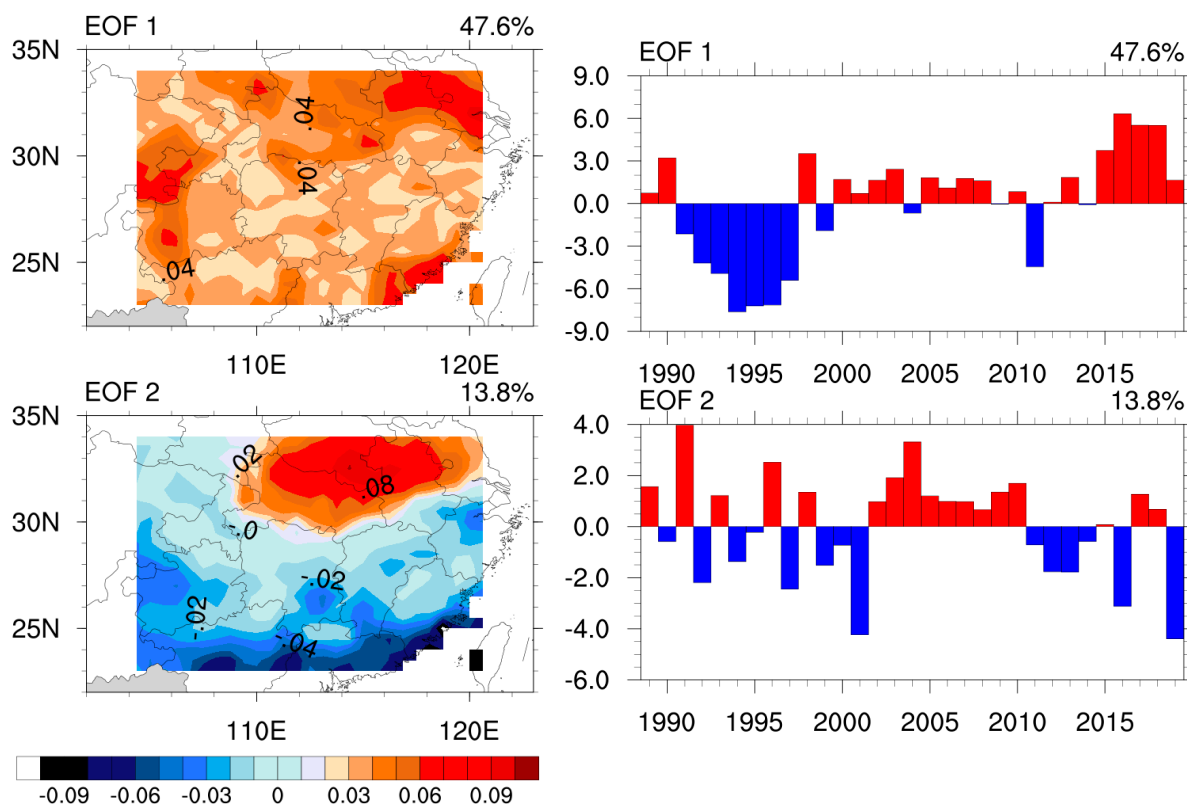

**Figure S2.** The spatial distribution (left) and principal components (right) of the first two modes in the energy control region for reanalyses. The numbers in the upper right corner of the figure represent the explanatory variances in the first modes.

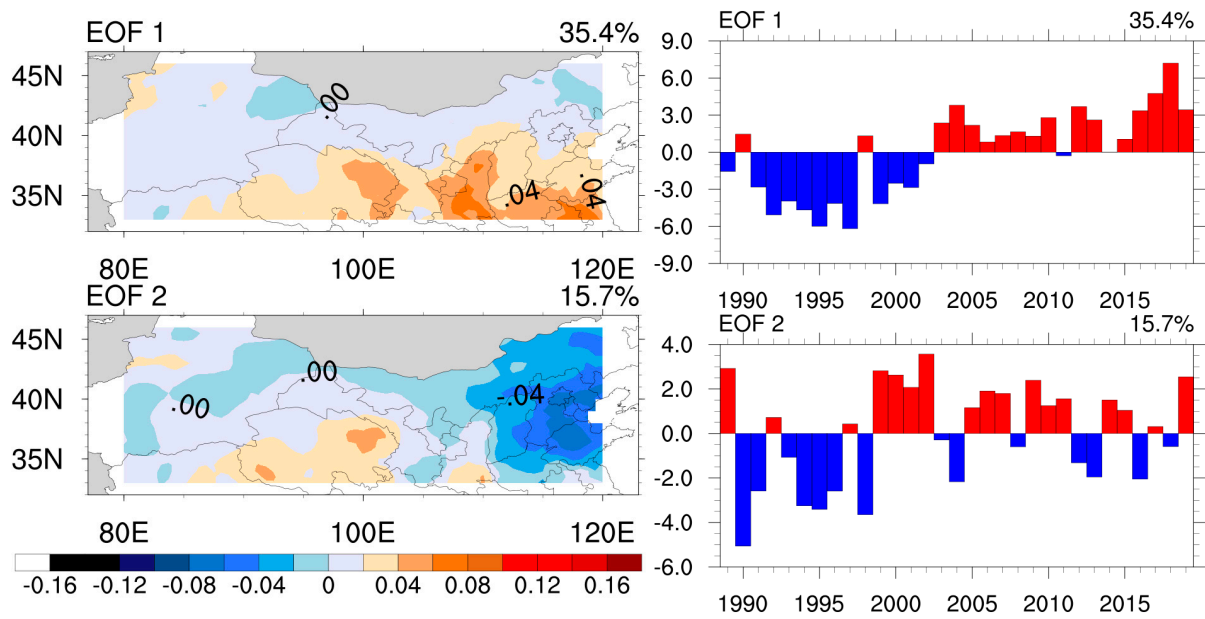

**Figure S3.** The spatial distribution (left) and principal components (right) of the first two modes in the water control region for reanalyses. The numbers in the upper right corner of the figure represent the explanatory variance in the first modes.
